# Supplementary material
Source: PubMed Central journal article supplement (PMC6036187)
Supplement: supp_RA118.002234_135747_2_supp_135585_p88smq.pdf [file supp_RA118.002234_135747_2_supp_135585_p88smq.pdf]

Supplementary material to

**The disorderly conduct of Hsc70:  
its interaction with the Alzheimer's related TAU protein as monitored by NMR.**

*Dedicated to the memory of Chad A. Dickey.*

Isabelle R. Taylor<sup>2</sup>, Atta Ahmad<sup>1</sup>, Taia Wu<sup>2</sup>, Bryce A. Nordhues<sup>3</sup>, Anup Bhullar<sup>1</sup>, Jason E. Gestwicki<sup>2\*</sup> and Erik R.P. Zuiderweg<sup>1\*</sup>,

1) Department of Biological Chemistry, The University of Michigan Medical School,  
1500 Medical Center Drive, Ann Arbor, MI 48109

2) Institute for Neurodegenerative Disease, University of California at San Francisco  
675 Nelson Rising Lane, San Francisco, CA 94158

3) Department of Molecular Medicine and Byrd Alzheimer's Institute, University of South Florida,  
Tampa, FL 33613.

\*) corresponding authors [zuiderwe@umich.edu](mailto:zuiderwe@umich.edu) and [Jason.Gestwicki@ucsf.edu](mailto:Jason.Gestwicki@ucsf.edu).

| Supplemental Table 1 |                       |                       |
|----------------------|-----------------------|-----------------------|
|                      | Wild type             | BETA (395-508)        |
|                      | EC <sub>50</sub> (μM) | EC <sub>50</sub> (μM) |
| 4R0N TAU             | 0.9 ± 0.2             | 3.4 ± 2.9             |
| TAU1                 | 17.0 ± 9.3            | 32.0 ± 22             |
| NRLLLTG              | 6.3 ± 3.5             | 28.0 ± 9.8            |
| C-PEPTIDE            | 0.2 ± 1.8             | 1.3 ± 0.6             |
| TAU2                 | > 50                  | > 200                 |
| Huntingtin           | > 200                 | > 200                 |
| KFERQ                | > 200                 | > 200                 |

**Table S1:** Binding of substrates to Hsp70 (HSPA1A) and its truncation by fluorescence polarization (FP).

TAU1: GKVQIINKKG; Insulin C-peptide (C-PEP); TAU2: VQIVYK; huntingtin: MATLEKLMKAFESLKSF.

The Fam-HLA tracer was at 20 nM, wt-Hsp70 at 5 μM, Hsp70- BETA at 1 μM.

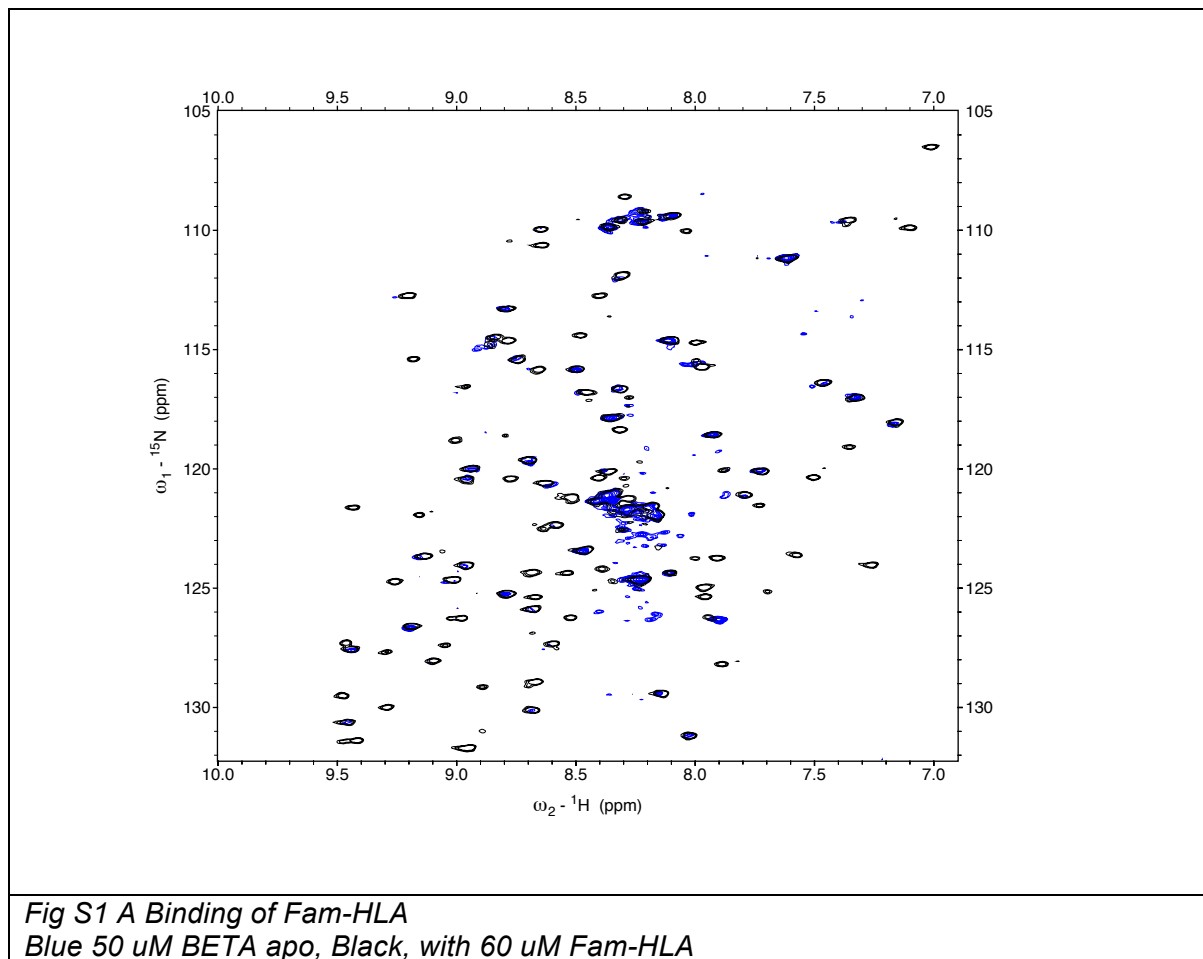

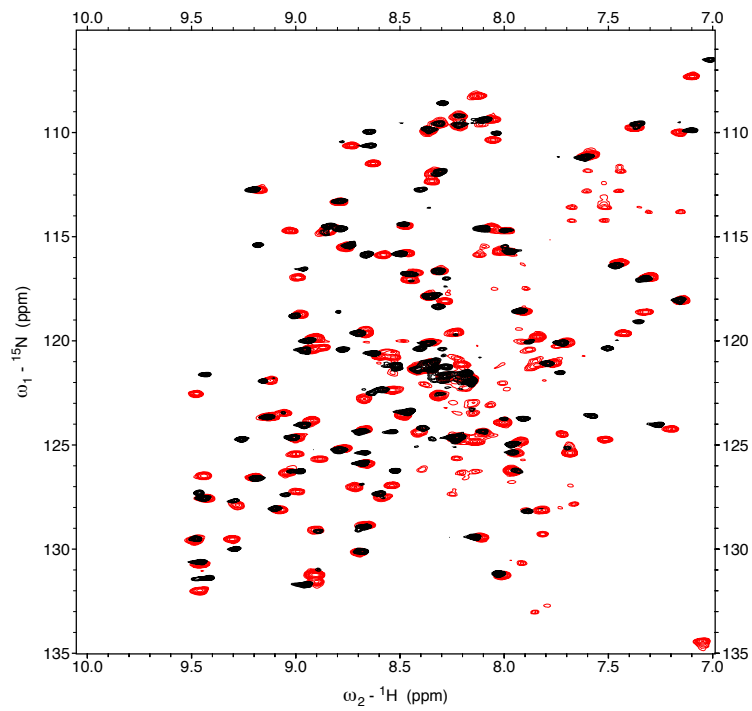

*Fig S1 B Binding of Fam-HLA compared with TAU1*  
*Black, 50  $\mu\text{M}$  BETA with 60  $\mu\text{M}$  Fam-HLA*  
*Red, 35  $\mu\text{M}$  BETA + 200  $\mu\text{M}$  TAU1 (GKVQIINKKG)*

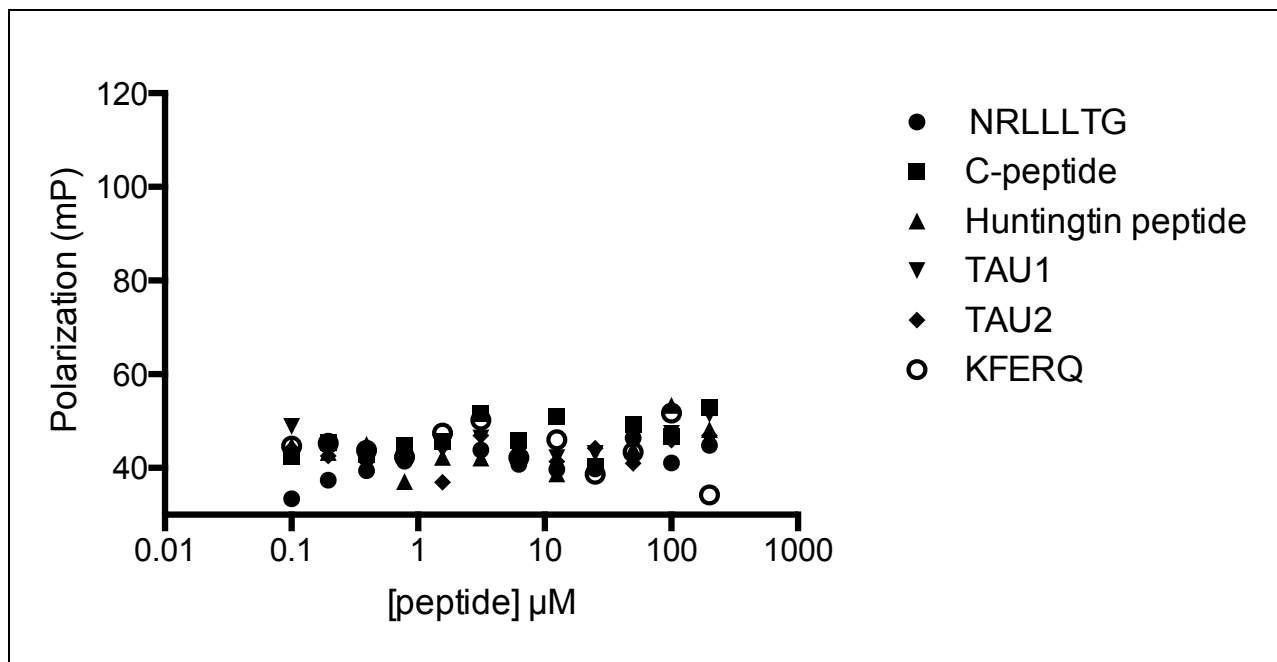

Figure S2.  
Effect of the different peptides on the fluorescence polarization of the HLA tracer

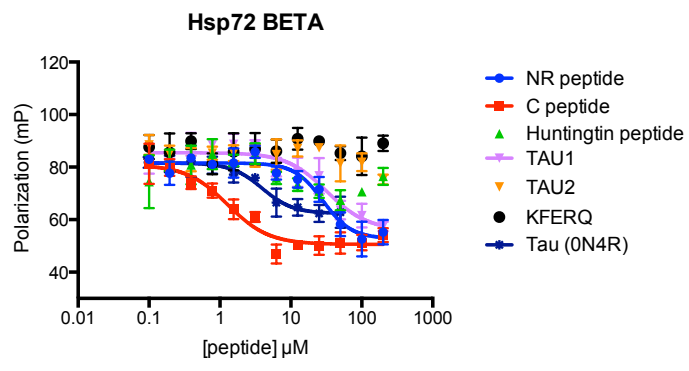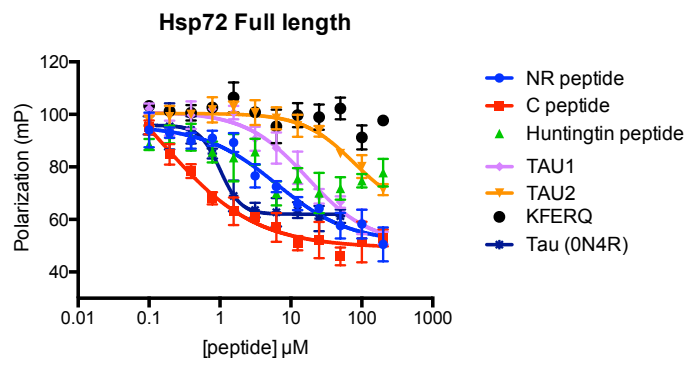

Figure S3. Interaction of peptides with inducible Hsp70 (HSPA1A) and its BETA construct.

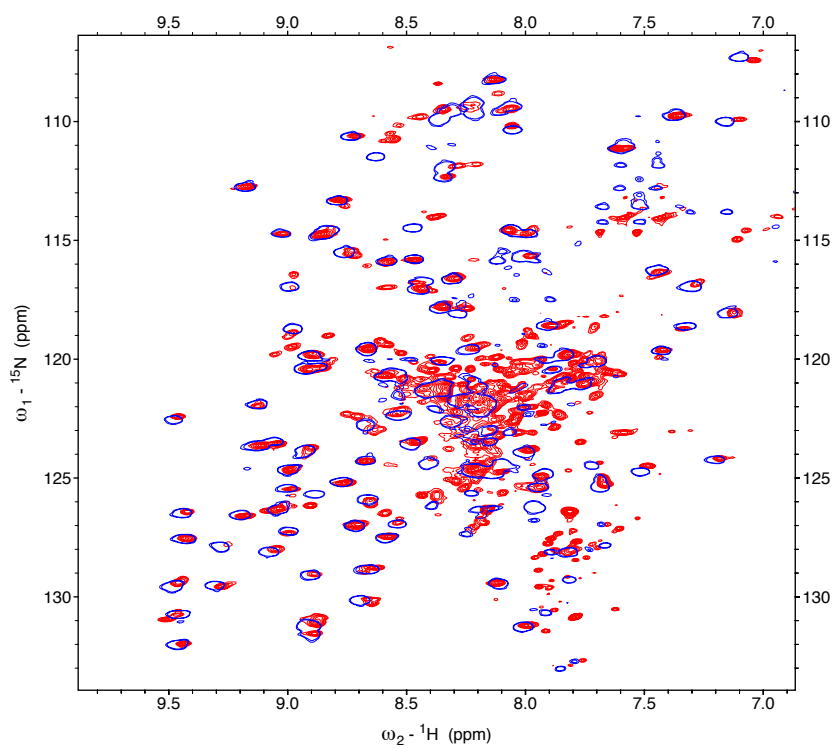

*Figure S4.*

${}^{15}\text{N}$ - ${}^1\text{H}$  TROSY spectra of BETA with unlabeled TAU1 in trans (blue; 113 residues) and the BETA-TAU1-CIS construct (red, 165 residues)

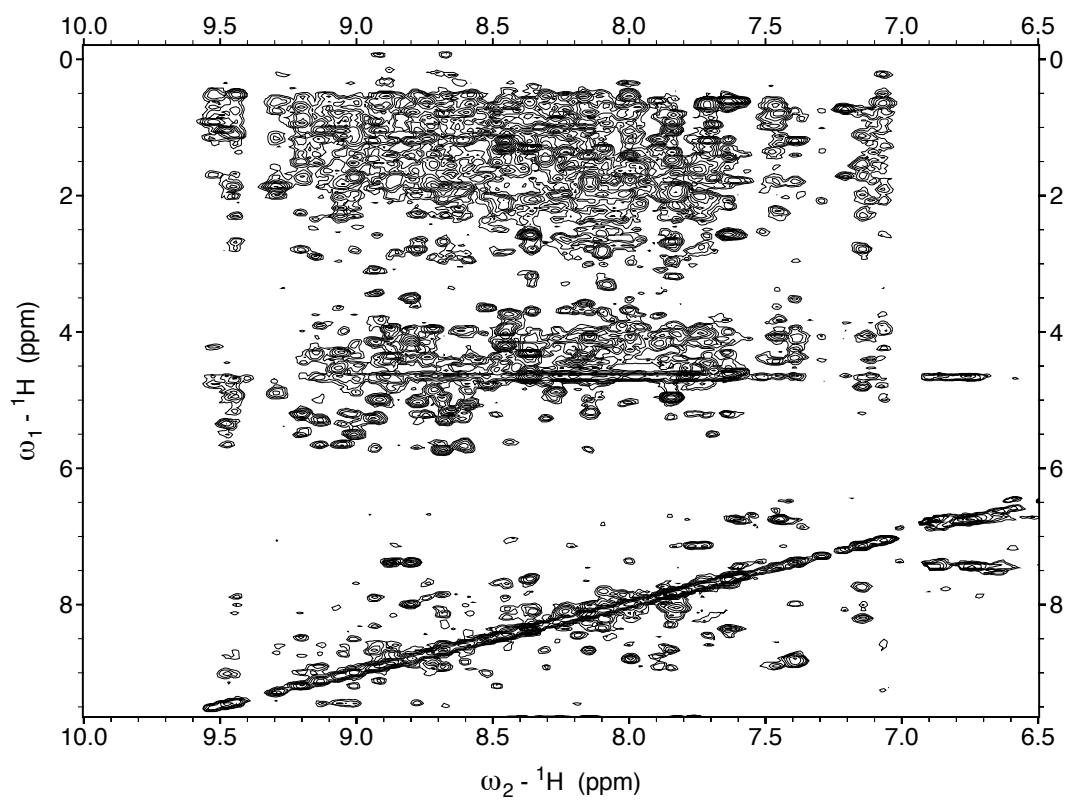

Figure S5.  $^1\text{H}$ - $^1\text{H}$ N Projection of the NUS 3D  $^1\text{H}$ - $\tau_{\text{M}}$ - $^{15}\text{N}$ - $^1\text{H}$ N NOESY-TROSY spectrum of BETA-TAU1-CIS. The mixing time  $\tau_{\text{M}}$  was 200 ms.



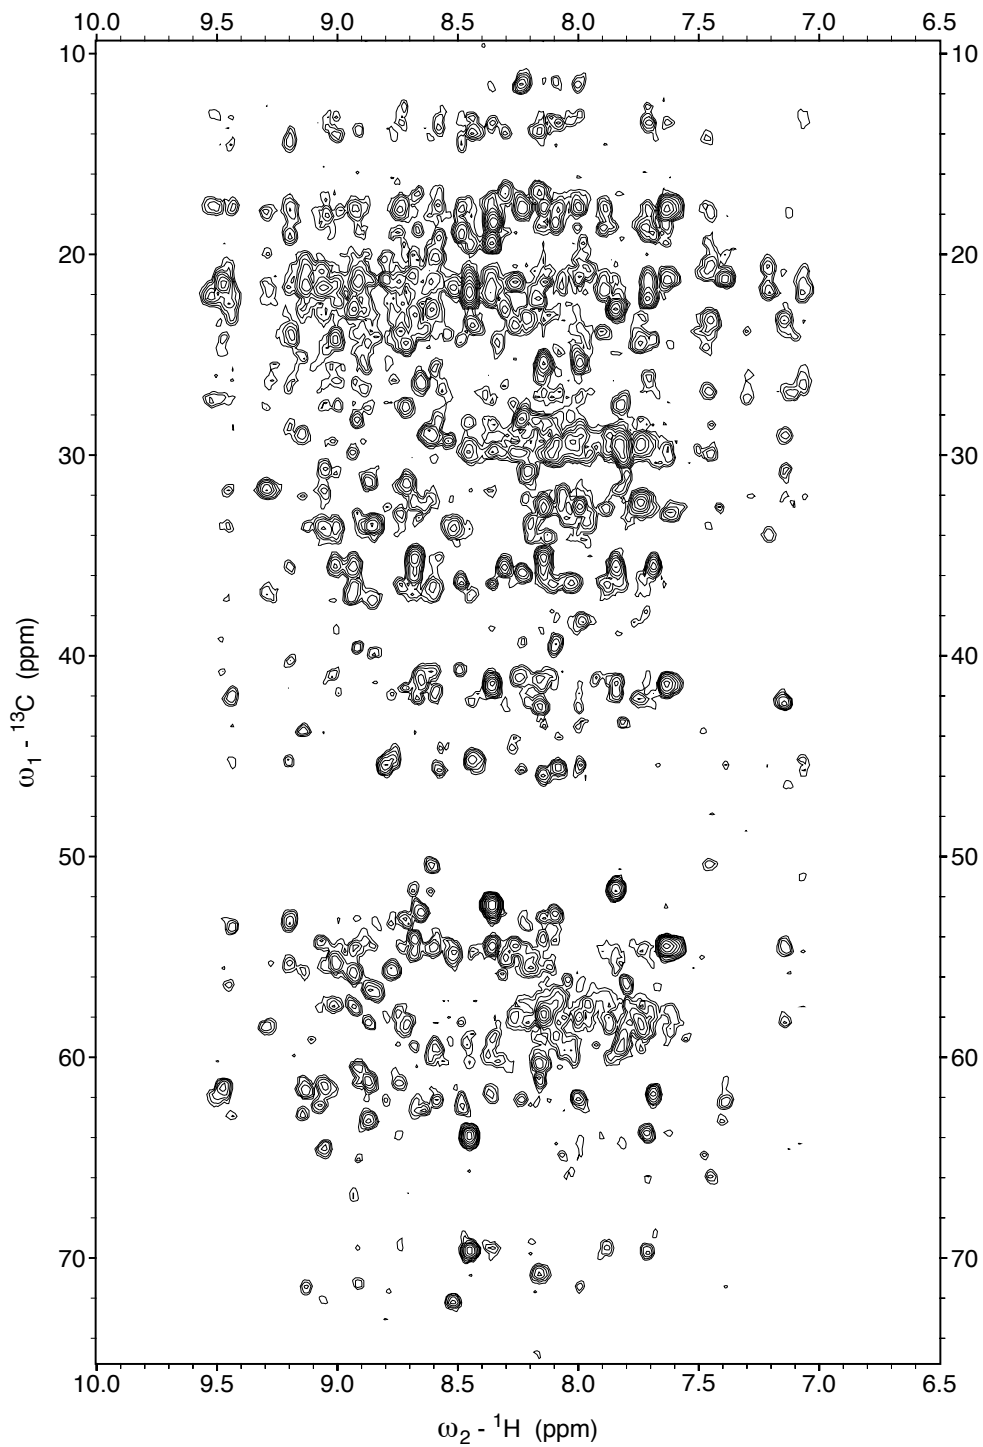

Figure S6.  $^{13}\text{C}$ - $^1\text{H}$  Projection of the NUS 3D ( $^1\text{H}$ )- $^{13}\text{C}$ -( $^1\text{H}$ )- $\tau_{\text{M}}$ - $^{15}\text{N}$ - $^1\text{H}$  HN HMQC-NOESY-TROSY spectrum of BETA-TAU1-CIS. The mixing time  $\tau_{\text{M}}$  was 200 ms.

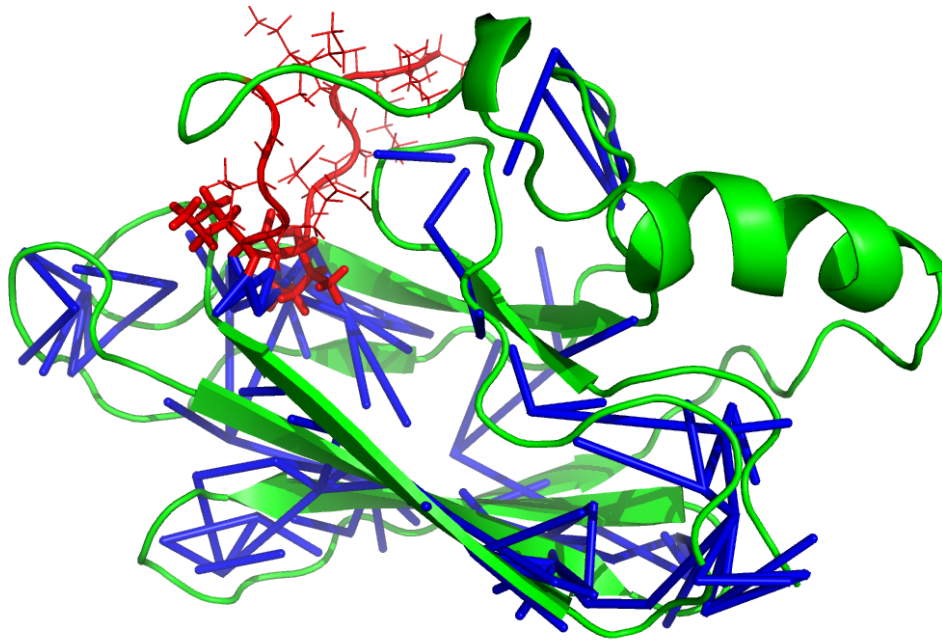

*Figure S7*

The molecular replacement structure for Hsc70 SBD with the sequence GKVQIINKKG in cis (red). In blue are non-sequential NOEs identified in the set of 3D NOE spectra confirming the structure of the BETA domain, and establishing details of the binding of GKVQIINKKG.

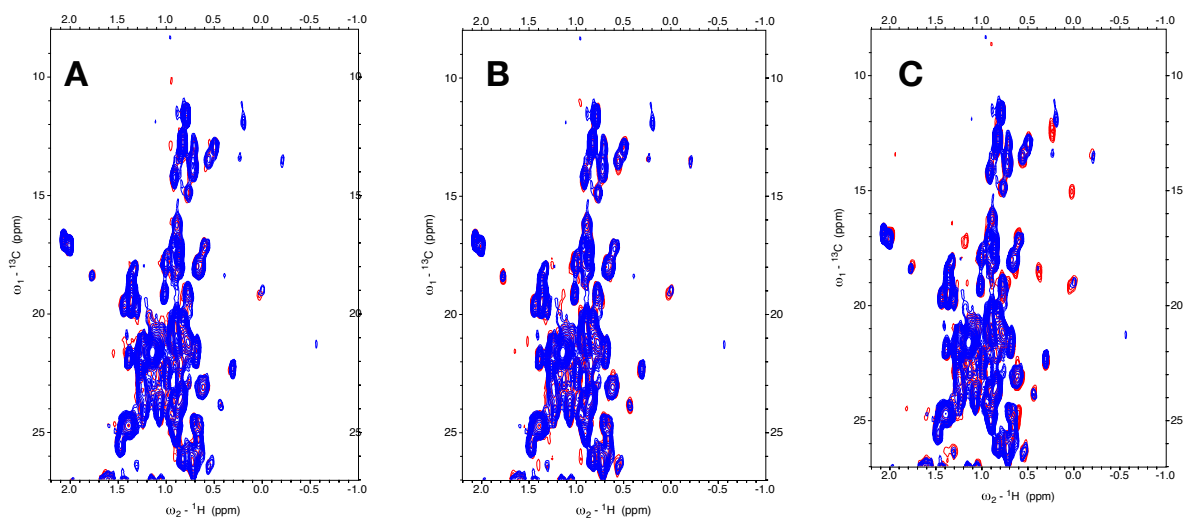

*Figure S8.*

Interaction tests with other peptides, methyl region of  $^{13}\text{C}$ - $^1\text{H}$  HSQC spectra

Panel A, 11  $\mu\text{M}$  BETA in blue superposed on 11  $\mu\text{M}$  BETA + 19  $\mu\text{M}$  KFERQ (CMA recognition sequence)

Panel B, 11  $\mu\text{M}$  BETA in blue superposed on 11  $\mu\text{M}$  BETA + 12  $\mu\text{M}$  MATLEKLMKAFESLKSF (Huntintin)

Panel C, 11  $\mu\text{M}$  BETA in blue superposed on 11  $\mu\text{M}$  BETA + 12  $\mu\text{M}$  insulin C-peptide (red)

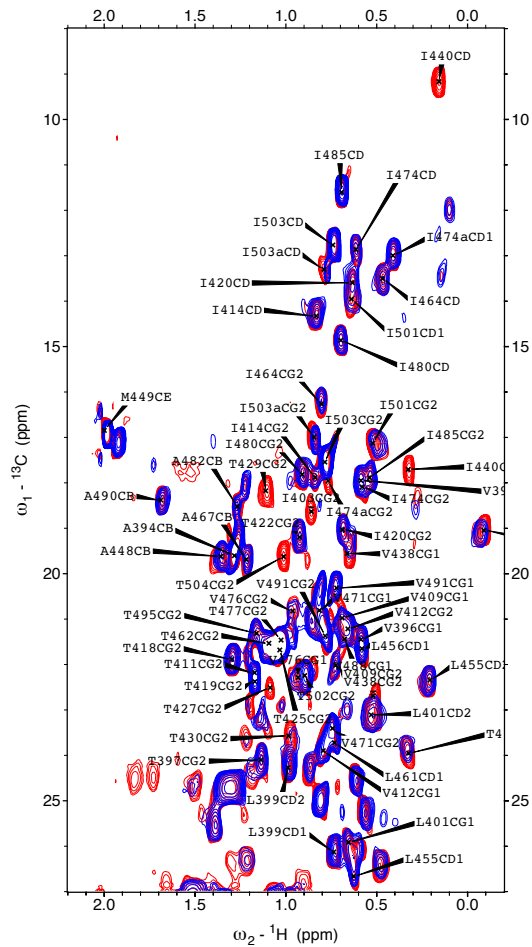

Figure 9.

Overlay of the  $^1\text{H}$ - $^{13}\text{C}$  constant-time HSQC of 35  $\mu\text{M}$  Hsc70 BETA (blue) and 35  $\mu\text{M}$  Hsc70-BETA with 200  $\mu\text{M}$  GKVQIINKKG (red). The assignments are indicated (BMRB accession code 27395)
